# Supplementary material for: Genome-wide identification and functional characterization of cotton (Gossypium hirsutum) MAPKKK gene family in response to drought stress
Source: PubMed Central journal article supplement (PMC7227315; doi:10.1186/s12870-020-02431-2), 2020-05-14
Supplement: 12870_2020_2431_MOESM1_ESM.pdf [file 12870_2020_2431_MOESM1_ESM.pdf]

## Additional file 1 (Tables and Figures)

**Table S1. Characterization of upland cotton (*Gossypium hirsutum*) MAPKKK family.**

| Gene name      | Gene symbol     | Protein Length(aa) | MW(kDa) | pI   | Chr | Chr location        | subcellular location |
|----------------|-----------------|--------------------|---------|------|-----|---------------------|----------------------|
| <i>GhRAF1</i>  | Ghir_A01G013020 | 790                | 86.94   | 5.71 | A01 | 59116528-59124508   | nucleus              |
| <i>GhRAF2</i>  | Ghir_A01G016390 | 640                | 73.17   | 7.46 | A01 | 106268030-106276569 | mitochondria         |
| <i>GhRAF3</i>  | Ghir_A02G000450 | 339                | 37.98   | 7.48 | A02 | 265264-268155       | cytoplasm            |
| <i>GhRAF4</i>  | Ghir_A02G000730 | 472                | 53.59   | 6.65 | A02 | 533011-536829       | nucleus              |
| <i>GhRAF5</i>  | Ghir_A02G003480 | 383                | 42.49   | 9.52 | A02 | 3913633-3915990     | cytoplasm            |
| <i>GhRAF6</i>  | Ghir_A02G005560 | 737                | 81.69   | 7.5  | A02 | 7937650-7943308     | nucleus              |
| <i>GhRAF7</i>  | Ghir_A02G005570 | 740                | 82.04   | 7.1  | A02 | 7967940-7973147     | nucleus              |
| <i>GhRAF8</i>  | Ghir_A02G019080 | 531                | 59.81   | 9.08 | A02 | 107728162-107734200 | cytoplasm            |
| <i>GhRAF9</i>  | Ghir_A03G011560 | 429                | 48.44   | 4.72 | A03 | 66726431-66731117   | nucleus              |
| <i>GhRAF10</i> | Ghir_A04G007330 | 851                | 94.44   | 6.72 | A04 | 55875639-55885335   | chloroplast          |
| <i>GhRAF11</i> | Ghir_A04G013720 | 560                | 63.32   | 6.7  | A04 | 82511312-82523191   | cytoplasm            |
| <i>GhRAF12</i> | Ghir_A05G000660 | 1101               | 122.21  | 6.02 | A05 | 791306-798656       | nucleus              |
| <i>GhRAF13</i> | Ghir_A05G004450 | 931                | 103.68  | 5.64 | A05 | 4095618-4103212     | nucleus              |
| <i>GhRAF14</i> | Ghir_A05G006850 | 419                | 46.76   | 5.87 | A05 | 6210586-6215373     | cytoplasm            |
| <i>GhRAF15</i> | Ghir_A05G018630 | 504                | 57.03   | 5.11 | A05 | 17620458-17627531   | cytoplasm            |
| <i>GhRAF16</i> | Ghir_A05G036930 | 352                | 39.79   | 5.67 | A05 | 97148360-97152224   | cytoplasm            |
| <i>GhRAF17</i> | Ghir_A05G037260 | 374                | 41.97   | 6.36 | A05 | 98076719-98080529   | nucleus              |
| <i>GhRAF18</i> | Ghir_A06G003070 | 915                | 102.20  | 5.06 | A06 | 3871954-3879898     | nucleus              |
| <i>GhRAF19</i> | Ghir_A06G005200 | 1361               | 147.82  | 6.54 | A06 | 8680343-8685948     | nucleus              |
| <i>GhRAF20</i> | Ghir_A06G016490 | 371                | 42.45   | 5.05 | A06 | 114049596-114052061 | mitochondria         |
| <i>GhRAF21</i> | Ghir_A07G000080 | 415                | 46.36   | 9.3  | A07 | 122914-127571       | cytoplasm            |
| <i>GhRAF22</i> | Ghir_A07G002310 | 844                | 94.54   | 5.41 | A07 | 2497285-2504622     | cytoplasm            |
| <i>GhRAF23</i> | Ghir_A07G023620 | 379                | 42.39   | 5    | A07 | 95826552-95830147   | nucleus              |
| <i>GhRAF24</i> | Ghir_A07G024120 | 354                | 40.03   | 7.82 | A07 | 96546518-96550072   | cytoplasm            |
| <i>GhRAF25</i> | Ghir_A08G007020 | 1110               | 122.58  | 6.85 | A08 | 11163822-11175803   | mitochondria         |
| <i>GhRAF26</i> | Ghir_A08G009370 | 1136               | 125.95  | 9.42 | A08 | 36606576-36615782   | nucleus              |
| <i>GhRAF27</i> | Ghir_A09G003240 | 351                | 39.65   | 5.78 | A09 | 10448608-10451805   | cytoplasm            |
| <i>GhRAF28</i> | Ghir_A09G005960 | 1035               | 113.38  | 5.58 | A09 | 45765254-45780842   | nucleus              |
| <i>GhRAF29</i> | Ghir_A09G007360 | 765                | 84.97   | 9.43 | A09 | 54426475-54431583   | nucleus              |
| <i>GhRAF30</i> | Ghir_A09G014590 | 846                | 94.01   | 7.02 | A09 | 69970458-69980083   | chloroplast          |
| <i>GhRAF31</i> | Ghir_A09G022480 | 470                | 53.03   | 6.3  | A09 | 78659520-78665922   | mitochondria         |
| <i>GhRAF32</i> | Ghir_A09G022610 | 355                | 39.85   | 8.8  | A09 | 78818941-78822312   | cytoplasm            |
| <i>GhRAF33</i> | Ghir_A09G023270 | 391                | 43.58   | 7.66 | A09 | 79321195-79325067   | cytoplasm            |
| <i>GhRAF34</i> | Ghir_A09G024870 | 777                | 86.08   | 7.31 | A09 | 80703148-80707529   | nucleus              |
| <i>GhRAF35</i> | Ghir_A10G000530 | 374                | 42.65   | 6.06 | A10 | 359133-362546       | mitochondria         |
| <i>GhRAF36</i> | Ghir_A10G014920 | 472                | 53.49   | 9.29 | A10 | 79999093-80009164   | chloroplast          |

|                |                 |      |        |      |     |                     |              |
|----------------|-----------------|------|--------|------|-----|---------------------|--------------|
| <i>GhRAF37</i> | Ghir_A10G017650 | 815  | 90.15  | 5.22 | A10 | 98138758-98144602   | plastid      |
| <i>GhRAF38</i> | Ghir_A10G017660 | 775  | 85.74  | 7.85 | A10 | 98138949-98144056   | nucleus      |
| <i>GhRAF39</i> | Ghir_A11G007400 | 383  | 42.65  | 9.55 | A11 | 6471350-6476392     | cytoplasm    |
| <i>GhRAF40</i> | Ghir_A11G018110 | 576  | 65.33  | 7.83 | A11 | 23594659-23601101   | cytoplasm    |
| <i>GhRAF41</i> | Ghir_A12G000340 | 390  | 43.49  | 8.55 | A12 | 498790-502564       | cytoplasm    |
| <i>GhRAF42</i> | Ghir_A12G017420 | 437  | 49.15  | 5.65 | A12 | 92993297-92998342   | cytoplasm    |
| <i>GhRAF43</i> | Ghir_A12G028160 | 1005 | 109.59 | 5.11 | A12 | 106836116-106845511 | chloroplast  |
| <i>GhRAF44</i> | Ghir_A12G028660 | 405  | 44.83  | 8.75 | A12 | 107354905-107359160 | nucleus      |
| <i>GhRAF45</i> | Ghir_A13G007800 | 422  | 47.24  | 6.43 | A13 | 22199989-22209556   | nucleus      |
| <i>GhRAF46</i> | Ghir_D01G000200 | 552  | 62.23  | 6.47 | D01 | 119887-126036       | cytoplasm    |
| <i>GhRAF47</i> | Ghir_D01G014020 | 859  | 94.98  | 6.58 | D01 | 33463668-33473973   | nucleus      |
| <i>GhRAF48</i> | Ghir_D01G017900 | 640  | 73.22  | 9.08 | D01 | 54254478-54262863   | mitochondria |
| <i>GhRAF49</i> | Ghir_D02G000450 | 353  | 39.42  | 7.86 | D02 | 292116-295007       | cytoplasm    |
| <i>GhRAF50</i> | Ghir_D02G000700 | 479  | 54.34  | 8.52 | D02 | 557041-561510       | nucleus      |
| <i>GhRAF51</i> | Ghir_D02G003900 | 421  | 47.12  | 7.26 | D02 | 4871769-4874033     | vacuole      |
| <i>GhRAF52</i> | Ghir_D02G005920 | 612  | 67.27  | 9.13 | D02 | 7896079-7899981     | nucleus      |
| <i>GhRAF53</i> | Ghir_D02G013070 | 430  | 48.50  | 6.05 | D02 | 43746961-43751699   | nucleus      |
| <i>GhRAF54</i> | Ghir_D03G000490 | 571  | 64.31  | 7.63 | D03 | 287684-293745       | cytoplasm    |
| <i>GhRAF55</i> | Ghir_D04G005790 | 374  | 41.93  | 6.36 | D04 | 9363047-9371442     | nucleus      |
| <i>GhRAF56</i> | Ghir_D04G006140 | 352  | 39.80  | 6.27 | D04 | 9990673-9994944     | cytoplasm    |
| <i>GhRAF57</i> | Ghir_D04G011410 | 769  | 85.44  | 6.03 | D04 | 36701936-36715894   | chloroplast  |
| <i>GhRAF58</i> | Ghir_D04G018140 | 581  | 65.69  | 5.68 | D04 | 53642245-53651176   | cytoplasm    |
| <i>GhRAF59</i> | Ghir_D05G004560 | 931  | 103.38 | 7.9  | D05 | 3654314-3661796     | nucleus      |
| <i>GhRAF60</i> | Ghir_D05G018650 | 546  | 61.82  | 7.59 | D05 | 16164014-16171000   | cytoplasm    |
| <i>GhRAF61</i> | Ghir_D06G003070 | 915  | 102.18 | 9.17 | D06 | 3677514-3685966     | nucleus      |
| <i>GhRAF62</i> | Ghir_D06G017360 | 371  | 42.43  | 8.11 | D06 | 57749167-57752516   | mitochondria |
| <i>GhRAF63</i> | Ghir_D07G000100 | 415  | 46.33  | 4.96 | D07 | 179515-186775       | chloroplast  |
| <i>GhRAF64</i> | Ghir_D07G002320 | 937  | 104.13 | 8.16 | D07 | 2398608-2406880     | cytoplasm    |
| <i>GhRAF65</i> | Ghir_D07G023720 | 407  | 45.62  | 9.43 | D07 | 57351655-57355299   | nucleus      |
| <i>GhRAF66</i> | Ghir_D07G024190 | 354  | 39.98  | 7.02 | D07 | 57953528-57957106   | cytoplasm    |
| <i>GhRAF67</i> | Ghir_D08G007100 | 1110 | 122.75 | 6.08 | D08 | 9538439-9550399     | mitochondria |
| <i>GhRAF68</i> | Ghir_D08G009250 | 1137 | 126.20 | 8.2  | D08 | 19075396-19083848   | nucleus      |
| <i>GhRAF69</i> | Ghir_D09G003170 | 368  | 41.74  | 9.61 | D09 | 9674313-9676427     | cytoplasm    |
| <i>GhRAF70</i> | Ghir_D09G005530 | 1038 | 113.70 | 7.76 | D09 | 25995770-26013030   | chloroplast  |
| <i>GhRAF71</i> | Ghir_D09G007100 | 766  | 85.43  | 9.5  | D09 | 31322296-31328509   | nucleus      |
| <i>GhRAF72</i> | Ghir_D09G021710 | 511  | 58.31  | 8.45 | D09 | 49737805-49743942   | plastid      |
| <i>GhRAF73</i> | Ghir_D09G021860 | 355  | 39.85  | 8.05 | D09 | 49864023-49867444   | cytoplasm    |
| <i>GhRAF74</i> | Ghir_D09G022500 | 391  | 43.62  | 5.05 | D09 | 50337160-50340960   | cytoplasm    |
| <i>GhRAF75</i> | Ghir_D09G024040 | 782  | 86.48  | 5.3  | D09 | 51636834-51641319   | nucleus      |
| <i>GhRAF76</i> | Ghir_D10G001280 | 374  | 42.58  | 9.49 | D10 | 1044184-1047688     | mitochondria |
| <i>GhRAF77</i> | Ghir_D10G012570 | 472  | 53.39  | 6.59 | D10 | 20394725-20405455   | chloroplast  |
| <i>GhRAF78</i> | Ghir_D10G015940 | 407  | 45.59  | 6.12 | D10 | 34491476-34496357   | nucleus      |
| <i>GhRAF79</i> | Ghir_D10G027360 | 822  | 91.39  | 6.52 | D10 | 42627-48353         | nucleus      |
| <i>GhRAF80</i> | Ghir_D10G027370 | 822  | 91.39  | 7.85 | D10 | 42627-48353         | nucleus      |

|                 |                 |      |        |      |     |                     |              |
|-----------------|-----------------|------|--------|------|-----|---------------------|--------------|
| <i>GhRAF81</i>  | Ghir_D11G007370 | 377  | 42.05  | 8.15 | D11 | 5956229-5961305     | cytoplasm    |
| <i>GhRAF82</i>  | Ghir_D11G013250 | 391  | 43.65  | 9.12 | D11 | 12324700-12328019   | nucleus      |
| <i>GhRAF83</i>  | Ghir_D11G018170 | 575  | 65.08  | 6.55 | D11 | 19660407-19666208   | cytoplasm    |
| <i>GhRAF84</i>  | Ghir_D12G000320 | 390  | 43.51  | 4.76 | D12 | 496884-500310       | cytoplasm    |
| <i>GhRAF85</i>  | Ghir_D12G017630 | 407  | 45.66  | 6.51 | D12 | 50376204-50380659   | nucleus      |
| <i>GhRAF86</i>  | Ghir_D12G028810 | 395  | 44.04  | 6.92 | D12 | 62344984-62348539   | cytoplasm    |
| <i>GhRAF87</i>  | Ghir_D13G008130 | 422  | 47.36  | 5.13 | D13 | 14566968-14572225   | nucleus      |
| <i>GhMEKK1</i>  | Ghir_A01G007310 | 437  | 48.73  | 4.4  | A01 | 12214003-12215349   | chloroplast  |
| <i>GhMEKK2</i>  | Ghir_A01G001550 | 1392 | 153.45 | 6.38 | A01 | 1347205-1364027     | nucleus      |
| <i>GhMEKK3</i>  | Ghir_A02G007890 | 576  | 63.86  | 7.86 | A02 | 14863551-14868958   | nucleus      |
| <i>GhMEKK4</i>  | Ghir_A02G017190 | 338  | 37.24  | 4.8  | A02 | 105635187-105636628 | nucleus      |
| <i>GhMEKK5</i>  | Ghir_A03G003570 | 483  | 54.23  | 7.04 | A03 | 5378191-5379713     | chloroplast  |
| <i>GhMEKK6</i>  | Ghir_A05G017620 | 451  | 50.22  | 8.12 | A05 | 16817349-16819236   | chloroplast  |
| <i>GhMEKK7</i>  | Ghir_A05G023670 | 590  | 65.81  | 7.33 | A05 | 23521490-23527510   | mitochondria |
| <i>GhMEKK8</i>  | Ghir_A05G039730 | 661  | 71.49  | 7.83 | A05 | 104396747-104402568 | nucleus      |
| <i>GhMEKK9</i>  | Ghir_A08G019150 | 898  | 96.61  | 5.83 | A08 | 113804134-113811609 | nucleus      |
| <i>GhMEKK10</i> | Ghir_A08G021040 | 510  | 57.38  | 4.66 | A08 | 116673745-116675288 | chloroplast  |
| <i>GhMEKK11</i> | Ghir_A09G006310 | 696  | 77.07  | 8.21 | A09 | 48820595-48825206   | nucleus      |
| <i>GhMEKK12</i> | Ghir_A10G000750 | 446  | 49.88  | 5.16 | A10 | 542297-544223       | chloroplast  |
| <i>GhMEKK13</i> | Ghir_A10G008980 | 336  | 37.06  | 8.89 | A10 | 17413794-17415339   | cytoplasm    |
| <i>GhMEKK14</i> | Ghir_A10G009080 | 609  | 67.15  | 5.67 | A10 | 17850579-17854710   | chloroplast  |
| <i>GhMEKK15</i> | Ghir_A11G005180 | 711  | 78.83  | 8.93 | A11 | 4446012-4450377     | nucleus      |
| <i>GhMEKK16</i> | Ghir_A11G035820 | 359  | 40.06  | 7.85 | A11 | 74237-75959         | nucleus      |
| <i>GhMEKK17</i> | Ghir_A11G028650 | 649  | 71.28  | 6.18 | A11 | 110953343-110957688 | chloroplast  |
| <i>GhMEKK18</i> | Ghir_A12G000100 | 659  | 71.27  | 9.09 | A12 | 128695-134251       | nucleus      |
| <i>GhMEKK19</i> | Ghir_A12G007320 | 724  | 79.50  | 8.34 | A12 | 20022401-20027163   | chloroplast  |
| <i>GhMEKK20</i> | Ghir_A12G014480 | 1419 | 156.93 | 6.58 | A12 | 85092129-85106151   | nucleus      |
| <i>GhMEKK21</i> | Ghir_A13G024620 | 480  | 53.88  | 4.87 | A13 | 108139019-108140767 | nucleus      |
| <i>GhMEKK22</i> | Ghir_D01G001550 | 1390 | 153.24 | 6.42 | D01 | 1117035-1129976     | nucleus      |
| <i>GhMEKK23</i> | Ghir_D01G007620 | 437  | 48.70  | 4.4  | D01 | 10460363-10461748   | chloroplast  |
| <i>GhMEKK24</i> | Ghir_D02G008300 | 589  | 65.29  | 6.21 | D02 | 13393209-13401017   | nucleus      |
| <i>GhMEKK25</i> | Ghir_D02G019480 | 1433 | 157.75 | 6.19 | D02 | 64489810-64506546   | nucleus      |
| <i>GhMEKK26</i> | Ghir_D03G002430 | 338  | 37.27  | 4.74 | D03 | 2289862-2291287     | nucleus      |
| <i>GhMEKK27</i> | Ghir_D03G015380 | 466  | 52.13  | 7.57 | D03 | 47788539-47791494   | chloroplast  |
| <i>GhMEKK28</i> | Ghir_D04G003320 | 492  | 54.23  | 9.47 | D04 | 4494122-4499940     | mitochondria |
| <i>GhMEKK29</i> | Ghir_D05G010730 | 519  | 58.18  | 5.12 | D05 | 9039986-9043494     | nucleus      |
| <i>GhMEKK31</i> | Ghir_D05G017600 | 328  | 36.08  | 5.65 | D05 | 15286900-15287915   | chloroplast  |
| <i>GhMEKK32</i> | Ghir_D05G023540 | 590  | 65.77  | 5.8  | D05 | 21265802-21271793   | mitochondria |
| <i>GhMEKK33</i> | Ghir_D08G020070 | 886  | 95.34  | 4.71 | D08 | 60648887-60653844   | nucleus      |
| <i>GhMEKK34</i> | Ghir_D08G021840 | 485  | 54.48  | 9.29 | D08 | 63216185-63217671   | chloroplast  |
| <i>GhMEKK35</i> | Ghir_D09G004580 | 896  | 96.72  | 7.83 | D09 | 17634778-17642198   | nucleus      |
| <i>GhMEKK36</i> | Ghir_D09G005940 | 666  | 73.65  | 5.52 | D09 | 27714016-27718642   | nucleus      |
| <i>GhMEKK37</i> | Ghir_D10G001500 | 445  | 49.28  | 8.89 | D10 | 1232613-1234017     | chloroplast  |
| <i>GhMEKK38</i> | Ghir_D10G010170 | 613  | 67.53  | 6.02 | D10 | 12704209-12708378   | chloroplast  |

|                 |                 |      |        |      |     |                     |             |
|-----------------|-----------------|------|--------|------|-----|---------------------|-------------|
| <i>GhMEKK39</i> | Ghir_D10G010300 | 336  | 37.02  | 8.25 | D10 | 12944719-12946243   | cytoplasm   |
| <i>GhMEKK39</i> | Ghir_D11G005120 | 711  | 78.85  | 8.82 | D11 | 4146812-4151046     | nucleus     |
| <i>GhMEKK40</i> | Ghir_D11G020530 | 359  | 39.96  | 6.6  | D11 | 24796013-24797663   | nucleus     |
| <i>GhMEKK41</i> | Ghir_D11G028840 | 663  | 72.81  | 6.63 | D11 | 61257989-61262800   | chloroplast |
| <i>GhMEKK42</i> | Ghir_D12G000070 | 657  | 71.09  | 6    | D12 | 118968-123487       | nucleus     |
| <i>GhMEKK43</i> | Ghir_D12G007230 | 724  | 79.39  | 8.15 | D12 | 13666895-13671597   | chloroplast |
| <i>GhMEKK44</i> | Ghir_D12G009430 | 350  | 39.04  | 8.37 | D12 | 30737030-30738538   | nucleus     |
| <i>GhMEKK45</i> | Ghir_D12G014650 | 1419 | 156.77 | 5.04 | D12 | 45189485-45203561   | nucleus     |
| <i>GhMEKK46</i> | Ghir_D13G025390 | 400  | 44.60  | 5.14 | D13 | 63120547-63122405   | cytoplasm   |
| <i>GhZIK1</i>   | Ghir_A01G007760 | 294  | 33.51  | 4.76 | A01 | 12963498-12965306   | nucleus     |
| <i>GhZIK2</i>   | Ghir_A02G003230 | 295  | 83.12  | 5.06 | A02 | 3711890-3715525     | nucleus     |
| <i>GhZIK3</i>   | Ghir_A02G010480 | 593  | 68.47  | 5.54 | A02 | 44849057-44852765   | chloroplast |
| <i>GhZIK4</i>   | Ghir_A05G039820 | 734  | 68.02  | 5.63 | A05 | 104503240-104507236 | nucleus     |
| <i>GhZIK5</i>   | Ghir_A07G006240 | 643  | 68.75  | 8.56 | A07 | 7493603-7497360     | nucleus     |
| <i>GhZIK6</i>   | Ghir_A08G013280 | 584  | 75.45  | 8.81 | A08 | 95860535-95864059   | nucleus     |
| <i>GhZIK7</i>   | Ghir_A09G025930 | 607  | 72.14  | 4.79 | A09 | 81675593-81680150   | nucleus     |
| <i>GhZIK8</i>   | Ghir_A10G015190 | 300  | 67.70  | 4.64 | A10 | 83054890-83059051   | nucleus     |
| <i>GhZIK9</i>   | Ghir_A11G023700 | 593  | 72.43  | 9.68 | A11 | 71611997-71615920   | nucleus     |
| <i>GhZIK10</i>  | Ghir_A11G027620 | 606  | 65.84  | 8.11 | A11 | 108571185-108575022 | nucleus     |
| <i>GhZIK11</i>  | Ghir_A12G025200 | 610  | 68.38  | 6.97 | A12 | 104071155-104075057 | nucleus     |
| <i>GhZIK12</i>  | Ghir_A13G024870 | 611  | 67.42  | 7.87 | A13 | 108274667-108278662 | nucleus     |
| <i>GhZIK13</i>  | Ghir_D01G008110 | 667  | 33.70  | 8.33 | D01 | 11151704-11153578   | nucleus     |
| <i>GhZIK14</i>  | Ghir_D02G003610 | 639  | 82.81  | 6.13 | D02 | 4677447-4681187     | nucleus     |
| <i>GhZIK15</i>  | Ghir_D04G003230 | 593  | 67.82  | 7.85 | D04 | 4404068-4408048     | nucleus     |
| <i>GhZIK16</i>  | Ghir_D07G006240 | 643  | 68.65  | 5.83 | D07 | 6781781-6785762     | nucleus     |
| <i>GhZIK17</i>  | Ghir_D08G014030 | 573  | 75.63  | 6.66 | D08 | 48402157-48405717   | nucleus     |
| <i>GhZIK18</i>  | Ghir_D09G025080 | 607  | 69.97  | 5.13 | D09 | 52454940-52459320   | nucleus     |
| <i>GhZIK19</i>  | Ghir_D10G012370 | 593  | 67.73  | 4.85 | D10 | 19337073-19341117   | nucleus     |
| <i>GhZIK20</i>  | Ghir_D11G024040 | 734  | 72.10  | 5.65 | D11 | 43762327-43766202   | nucleus     |
| <i>GhZIK21</i>  | Ghir_D11G027780 | 609  | 67.05a | 5.79 | D11 | 59353199-59356901   | nucleus     |
| <i>GhZIK22</i>  | Ghir_D12G025200 | 609  | 68.57  | 7.66 | D12 | 59149045-59153596   | nucleus     |
| <i>GhZIK23</i>  | Ghir_D13G014800 | 668  | 34.31  | 5.99 | D13 | 48319020-48320442   | nucleus     |
| <i>GhZIK24</i>  | Ghir_D13G025640 | 621  | 67.44  | 4.8  | D13 | 63270786-63274742   | nucleus     |

Note: The DNA and protein sequences of GhMAPKKs can be found in cotton (*G. hirsutum*) genome database (<https://www.cottongen.org>).

**Table S2. Orthologous MAPKKK gene pairs of *Gossypium hirsutum*, *G. arboreum*, and *G. raimondii*.**

| <b>Genes of At<br/>subgenome</b> | <b>Orthologous genes in G.<br/>arboreum</b> | <b>Genes of Dt<br/>subgenome</b> | <b>Orthologous genes of G.<br/>raimondii</b> |
|----------------------------------|---------------------------------------------|----------------------------------|----------------------------------------------|
| <i>GhMEKK1</i>                   | Ga01G0882.1                                 | <i>GhMEKK22</i>                  | Gorai.002G016000.1                           |
| <i>GhMEKK2</i>                   | Ga01G0174.1                                 | <i>GhMEKK23</i>                  | Gorai.002G091000.1                           |
| <i>GhMEKK3</i>                   | Ga03G0881.1                                 | <i>GhMEKK24</i>                  | Gorai.005G091700.1                           |
| <i>GhMEKK4</i>                   | Ga02G0227.1                                 | <i>GhMEKK25</i>                  | Gorai.005G210100.1                           |
| <i>GhMEKK5</i>                   | Ga01G2525.1                                 | <i>GhMEKK26</i>                  | Gorai.003G025400.1                           |
| <i>GhMEKK6</i>                   | Ga05G1835.1                                 | <i>GhMEKK27</i>                  | Gorai.003G146500.1                           |
| <i>GhMEKK7</i>                   | Ga05G2467.1                                 | <i>GhMEKK28</i>                  | Gorai.012G034500.1                           |
| <i>GhMEKK8</i>                   | Ga04G1803.1                                 | <i>GhMEKK29</i>                  | Gorai.009G111600.1                           |
| <i>GhMEKK9</i>                   | Ga08G2155.1                                 | <i>GhMEKK31</i>                  | Gorai.009G242600.1                           |
| <i>GhMEKK10</i>                  | Ga08G2357.1                                 | <i>GhMEKK32</i>                  | Gorai.004G213200.1                           |
| <i>GhMEKK11</i>                  | Ga09G0760.1                                 | <i>GhMEKK33</i>                  | Gorai.004G232400.1                           |
| <i>GhMEKK12</i>                  | Ga10G2971.1                                 | <i>GhMEKK34</i>                  | Gorai.006G049500.1                           |
| <i>GhMEKK13</i>                  | Ga10G2072.1                                 | <i>GhMEKK35</i>                  | Gorai.006G052900.1                           |
| <i>GhMEKK14</i>                  | Ga10G2060.1                                 | <i>GhMEKK36</i>                  | Gorai.011G012900.1                           |
| <i>GhMEKK15</i>                  | Ga11G3597.1                                 | <i>GhMEKK37</i>                  | Gorai.011G104700.1                           |
| <i>GhMEKK16</i>                  | Ga11G1935.1                                 | <i>GhMEKK38</i>                  | Gorai.011G106000.1                           |
| <i>GhMEKK17</i>                  | Ga11G0898.1                                 | <i>GhMEKK39</i>                  | Gorai.007G053300.1                           |
| <i>GhMEKK18</i>                  | Ga12G2908.1                                 | <i>GhMEKK40</i>                  | Gorai.007G213900.1                           |
| <i>GhMEKK19</i>                  | Ga12G2339.1                                 | <i>GhMEKK41</i>                  | Gorai.007G296700.1                           |
| <i>GhMEKK20</i>                  | Ga12G1545.1                                 | <i>GhMEKK42</i>                  | Gorai.008G000500.1                           |
| <i>GhMEKK21</i>                  | Ga13G2820.1                                 | <i>GhMEKK43</i>                  | Gorai.008G073600.1                           |
| <i>GhRAF1</i>                    | Ga01G1576.1                                 | <i>GhMEKK44</i>                  | Gorai.008G077000.1                           |
| <i>GhRAF2</i>                    | Ga02G1149.1                                 | <i>GhMEKK45</i>                  | Gorai.008G149400.1                           |
| <i>GhRAF3</i>                    | Ga03G0041.1                                 | <i>GhMEKK46</i>                  | Gorai.013G269600.1                           |
| <i>GhRAF4</i>                    | Ga03G0070.1                                 | <i>GhRAF46</i>                   | Gorai.002G002100.1                           |
| <i>GhRAF5</i>                    | Ga03G0390.1                                 | <i>GhRAF47</i>                   | Gorai.002G159900.1                           |
| <i>GhRAF6</i>                    | Ga03G0610.1                                 | <i>GhRAF48</i>                   | Gorai.002G201200.1                           |
| <i>GhRAF7</i>                    | Ga03G0611.1                                 | <i>GhRAF49</i>                   | Gorai.005G004900.1                           |
| <i>GhRAF8</i>                    | Ga02G0049.1                                 | <i>GhRAF50</i>                   | Gorai.005G007700.1                           |
| <i>GhRAF9</i>                    | Ga03G1413.1                                 | <i>GhRAF51</i>                   | Gorai.005G044700.1                           |
| <i>GhRAF10</i>                   | Ga04G0943.1                                 | <i>GhRAF52</i>                   | Gorai.005G067300.1                           |
| <i>GhRAF11</i>                   | Ga04G0244.1                                 | <i>GhRAF53</i>                   | Gorai.005G142900.1                           |
| <i>GhRAF12</i>                   | Ga05G0062.1                                 | <i>GhRAF54</i>                   | Gorai.003G005100.1                           |
| <i>GhRAF13</i>                   | Ga05G0456.1                                 | <i>GhRAF55</i>                   | Gorai.001G261300.1                           |
| <i>GhRAF14</i>                   | Ga05G0706.1                                 | <i>GhRAF56</i>                   | Gorai.012G064800.1                           |
| <i>GhRAF15</i>                   | Ga05G1937.1                                 | <i>GhRAF57</i>                   | Gorai.009G408200.1                           |
| <i>GhRAF16</i>                   | Ga04G1468.1                                 | <i>GhRAF58</i>                   | Gorai.012G157000.1                           |
| <i>GhRAF17</i>                   | Ga04G1511.1                                 | <i>GhRAF59</i>                   | Gorai.009G045200.1                           |
| <i>GhRAF18</i>                   | Ga14G0424.1                                 | <i>GhRAF60</i>                   | Gorai.009G190600.1                           |
| <i>GhRAF19</i>                   | Ga06G0496.1                                 | <i>GhRAF61</i>                   | Gorai.010G033900.1                           |

|                |             |                |                    |
|----------------|-------------|----------------|--------------------|
| <i>GhRAF20</i> | Ga06G1869.1 | <i>GhRAF62</i> | Gorai.010G185600.1 |
| <i>GhRAF21</i> | Ga07G0011.1 | <i>GhRAF63</i> | Gorai.001G001200.1 |
| <i>GhRAF22</i> | Ga07G0240.1 | <i>GhRAF64</i> | Gorai.001G022800.1 |
| <i>GhRAF23</i> | Ga07G2547.1 | <i>GhRAF66</i> | Gorai.001G266100.1 |
| <i>GhRAF24</i> | Ga07G2599.1 | <i>GhRAF67</i> | Gorai.004G077800.1 |
| <i>GhRAF25</i> | Ga08G0757.1 | <i>GhRAF68</i> | Gorai.004G101000.1 |
| <i>GhRAF26</i> | Ga08G1003.1 | <i>GhRAF69</i> | Gorai.006G034500.1 |
| <i>GhRAF27</i> | Ga14G1817.1 | <i>GhRAF70</i> | Gorai.006G056600.1 |
| <i>GhRAF28</i> | Ga09G0686.1 | <i>GhRAF71</i> | Gorai.006G080100.1 |
| <i>GhRAF29</i> | Ga14G0576.1 | <i>GhRAF72</i> | Gorai.006G233100.1 |
| <i>GhRAF30</i> | Ga09G1563.1 | <i>GhRAF73</i> | Gorai.006G234800.1 |
| <i>GhRAF31</i> | Ga09G2426.1 | <i>GhRAF74</i> | Gorai.006G241500.1 |
| <i>GhRAF32</i> | Ga09G2438.1 | <i>GhRAF75</i> | Gorai.006G258400.1 |
| <i>GhRAF33</i> | Ga09G2365.1 | <i>GhRAF76</i> | Gorai.011G010500.1 |
| <i>GhRAF34</i> | Ga09G2670.1 | <i>GhRAF77</i> | Gorai.011G131000.1 |
| <i>GhRAF35</i> | Ga10G2994.1 | <i>GhRAF78</i> | Gorai.011G167400.1 |
| <i>GhRAF36</i> | Ga10G1766.1 | <i>GhRAF79</i> | Gorai.011G200300.1 |
| <i>GhRAF38</i> | Ga10G1015.1 | <i>GhRAF81</i> | Gorai.007G076700.1 |
| <i>GhRAF39</i> | Ga11G3372.1 | <i>GhRAF82</i> | Gorai.007G139200.1 |
| <i>GhRAF40</i> | Ga11G2193.1 | <i>GhRAF83</i> | Gorai.007G190200.1 |
| <i>GhRAF41</i> | Ga12G2886.1 | <i>GhRAF84</i> | Gorai.008G003000.1 |
| <i>GhRAF42</i> | Ga12G1203.1 | <i>GhRAF85</i> | Gorai.008G179300.1 |
| <i>GhRAF43</i> | Ga12G0091.1 | <i>GhRAF86</i> | Gorai.008G294700.1 |
| <i>GhRAF44</i> | Ga12G0039.1 | <i>GhRAF87</i> | Gorai.013G089100.1 |
| <i>GhRAF45</i> | Ga13G0934.1 | <i>GhZIK13</i> | Gorai.002G096100.1 |
| <i>GhZIK1</i>  | Ga01G0928.1 | <i>GhZIK14</i> | Gorai.005G042400.1 |
| <i>GhZIK2</i>  | Ga03G0365.1 | <i>GhZIK15</i> | Gorai.012G033500.1 |
| <i>GhZIK3</i>  | Ga01G1804.1 | <i>GhZIK16</i> | Gorai.001G064400.1 |
| <i>GhZIK4</i>  | Ga04G1748.1 | <i>GhZIK17</i> | Gorai.004G150400.1 |
| <i>GhZIK5</i>  | Ga07G0665.1 | <i>GhZIK18</i> | Gorai.006G269500.1 |
| <i>GhZIK6</i>  | Ga08G1482.1 | <i>GhZIK19</i> | Gorai.011G128900.1 |
| <i>GhZIK7</i>  | Ga09G2783.1 | <i>GhZIK20</i> | Gorai.003G069600.1 |
| <i>GhZIK8</i>  | Ga10G1803.1 | <i>GhZIK21</i> | Gorai.007G285300.1 |
| <i>GhZIK9</i>  | Ga14G2590.1 | <i>GhZIK22</i> | Gorai.008G257300.1 |
| <i>GhZIK10</i> | Ga11G0996.1 | <i>GhZIK23</i> | Gorai.013G156000.1 |
| <i>GhZIK11</i> | Ga12G0406.1 | <i>GhZIK24</i> | Gorai.013G272100.1 |
| <i>GhZIK12</i> | Ga14G0657.1 |                |                    |

---

**Table S3. Primers used in vector construction and quantitative RT-PCR analysis.**

| <b>Gene</b>          | <b>Primer</b>                |
|----------------------|------------------------------|
| <i>GhRAF4-F</i>      | GGAATTCCAAGGACAGCCATTCAGACCC |
| <i>GhRAF4-R</i>      | GGGTACCCTGGACGTGCTAATTTGGCCT |
| <i>GhMEKK12-F</i>    | GGAATTCCTGCCGTTAAGTCCTCTGAGC |
| <i>GhMEKK12-R</i>    | GGGTACCCATGTCAGCTGGGAACCCCTG |
| <i>GhMEKK10-RT-F</i> | GCTTGGCGATCCACCAATCAGA       |
| <i>GhMEKK10-RT-R</i> | CGCCGCCGAGGATTCATTCTTA       |
| <i>GhMEKK12-RT-F</i> | GAAGAAGAAGCGTGGGTAGCAG       |
| <i>GhMEKK12-RT-R</i> | TGCCACTAATCTCTAAGTCTAAGCC    |
| <i>GhMEKK24-RT-F</i> | TTTCGTCTCGAAGGAACCGACG       |
| <i>GhMEKK24-RT-R</i> | CCGAGGCAGAAGATCCGATGAC       |
| <i>GhMEKK31-RT-F</i> | TTTCGTCTCGAAGGAACCGACG       |
| <i>GhMEKK31-RT-R</i> | CCGAGGCAGAAGATCCGATGAC       |
| <i>GhMEKK36-RT-F</i> | CGGATTCTCATCTGATGTGCCTGA     |
| <i>GhMEKK36-RT-R</i> | CAATACGCTGCTGGGTGTCTCA       |
| <i>GhMEKK40-RT-F</i> | ACGGTTGAGAAGGGTGAGAAGT       |
| <i>GhMEKK40-RT-R</i> | GGATTCAATCAAGTTTCCGCCGC      |
| <i>GhRAF4-RT-F</i>   | CCCACCGAAGAGGCCGTAAAAT       |
| <i>GhRAF4-RT-R</i>   | CCAACATTCTCCGATGAGCTCCC      |
| <i>GhRAF8-RT-F</i>   | CTGGCAACAGGACCCAACTCAA       |
| <i>GhRAF8-RT-R</i>   | GGCGATCTTCCCCCTTATCTGC       |
| <i>GhRAF21-RT-F</i>  | GAACCGTGCTGTGCCATTGAAG       |
| <i>GhRAF21-RT-R</i>  | TCTGGTGTCATGCCCTCAGTCT       |
| <i>GhRAF78-RT-F</i>  | CTGCGAGCATCATTTCGGCAAG       |
| <i>GhRAF78-RT-R</i>  | CCATTGAGGCCCCCAAACTT         |
| <i>GhRAF87-RT-F</i>  | TCTTACGGCCAAAGTGGAAGCC       |
| <i>GhRAF87-RT-R</i>  | GACAGCTACAGGTGTTCCCTCGC      |
| <i>GhUBI1-F</i>      | CTGAATCTTCGCTTTCACGTTATC     |
| <i>GhUBI1-R</i>      | GGGATGCAAATCTTCGTGAAAAC      |

A

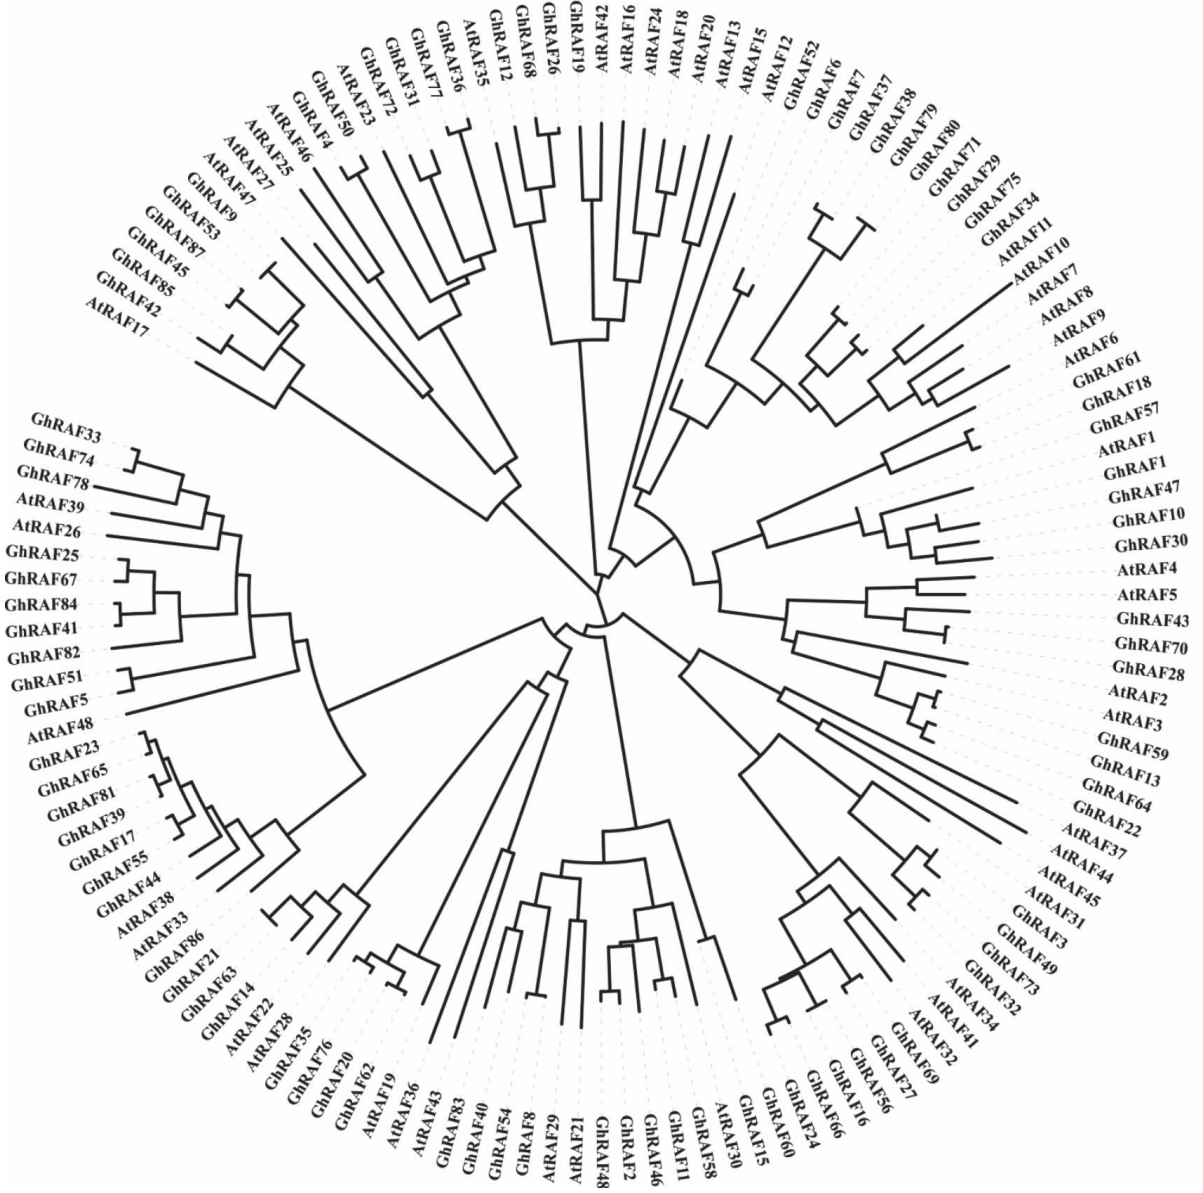





**C**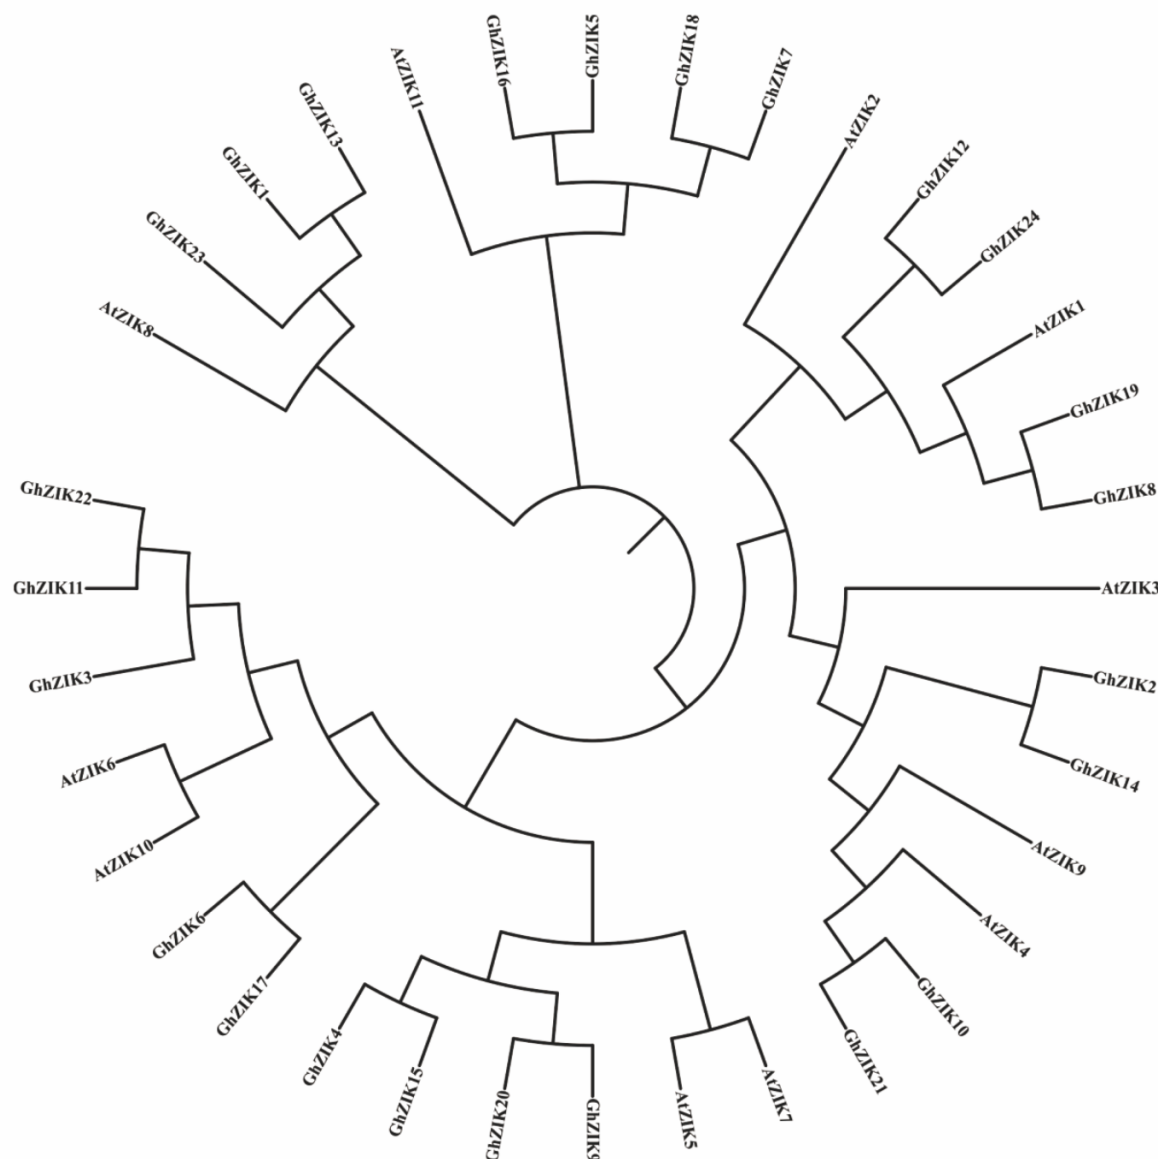

**Figure S1. Phylogenetic relationship of GhMAPKKKs and AtMAPKKKs.** (A) Phylogenetic relationship of GhRAFs and AtRAFs. (B) Phylogenetic relationship of GhRAFs and AtMEKKs. (C) Phylogenetic relationship of GhZIKs and AtZIKs. The unrooted phylogenetic tree was constructed using MEGA 6.0 by Neighbor-Joining method and the bootstrap test was performed with 1,000 iterations. Gh, upland cotton; At, Arabidopsis.

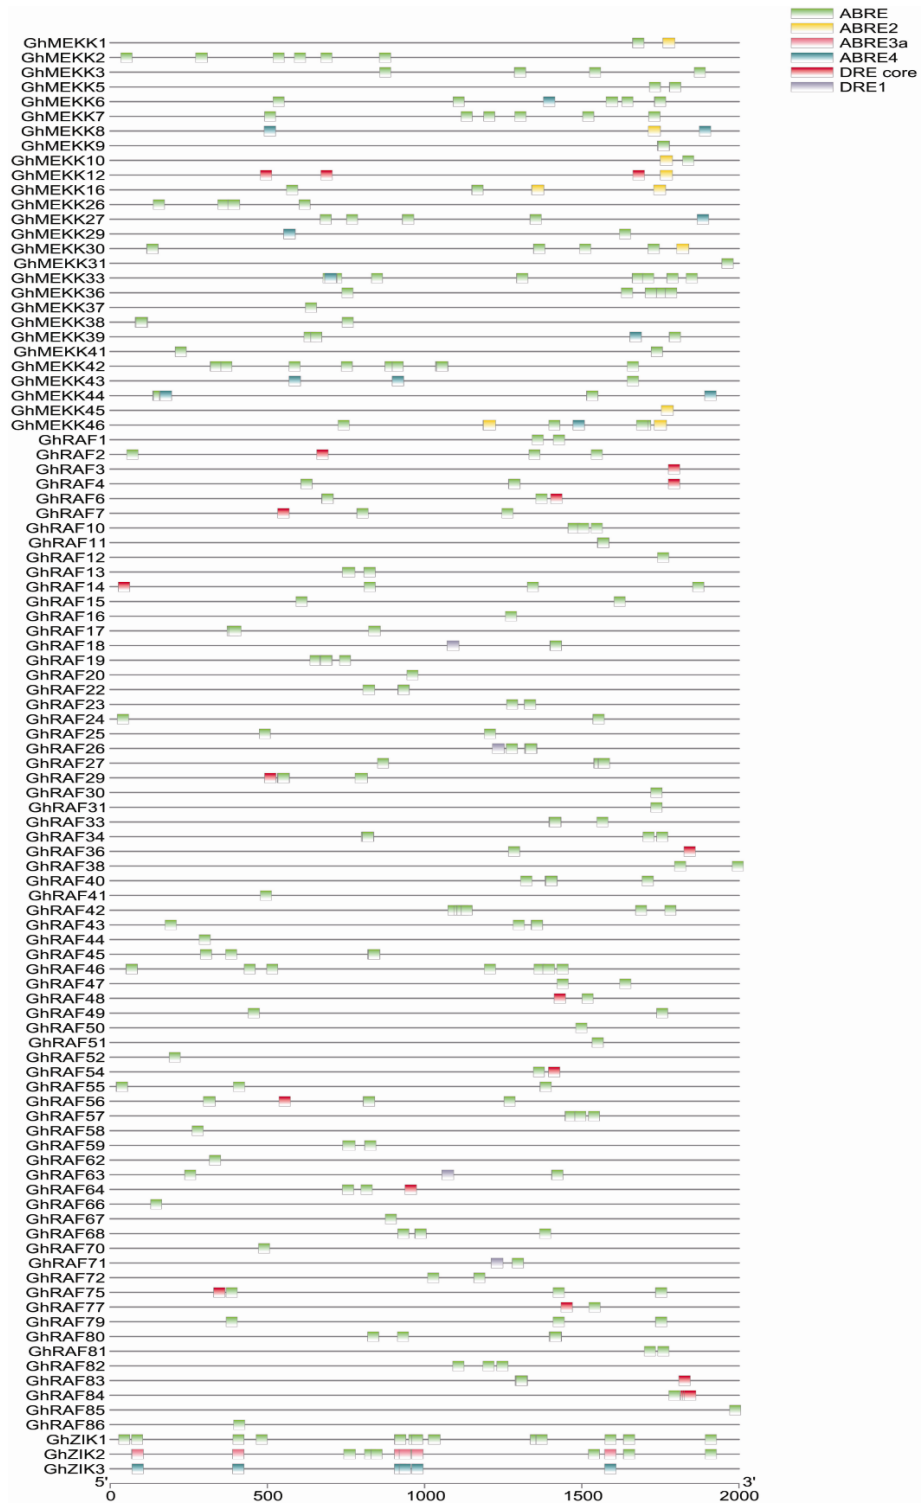

**Figure S2. Analysis of *GhMAPKKK* promoters.** The cis-elements existed in the promoter sequences were identified in cotton MAPKKK gene family. Each cis-element is indicated with a specific color.
